# Supplementary material for: Streptococcal H2O2 inhibits IgE-triggered degranulation of RBL-2H3 mast cell/basophil cell line by inducing cell death
Source: PubMed Central journal article supplement (PMC7164662; doi:10.1371/journal.pone.0231101), 2020-04-17
Supplement: pone.0231101.s005.pdf [file pone.0231101.s005.pdf]

# 1 **S1 Appendix Materials and Methods, Results and**

## 2 **Discussion for S4 Fig.**

### 3 4 **Materials and Methods for S4 Fig.**

5 Prior to bacterial infection or H<sub>2</sub>O<sub>2</sub> treatment, the RBL-2H3 cells were treated with 0.5,  
6 2, or 5 mM of deferoxamine (DFO) mesylate (a bacterial siderophore that chelates iron  
7 [Fe]; Sigma-Aldrich). The cells were then infected with viable *S. oralis* strains (MOI =  
8 200) or treated with 2 mM H<sub>2</sub>O<sub>2</sub> for 3 h. Cells were washed with PBS, and cultured in  
9 fresh medium containing antibiotics for 21 h. The viability was determined using the  
10 trypan blue staining.

### 11 12 **Results and Discussion for S4 Fig.**

13 DFO is an iron [Fe] chelator, and it has been also reported to reduce the production of  
14 peroxide radicals from H<sub>2</sub>O<sub>2</sub> within lysosomes [62, 63]. This Fig. shows that DFO  
15 reduced the cytotoxicity of streptococcal H<sub>2</sub>O<sub>2</sub>, suggesting that oxygen radicals from  
16 H<sub>2</sub>O<sub>2</sub> contribute to the lysosomal dysfunction and death of mast cells.
