# Supplementary material for: Streptococcal H2O2 inhibits IgE-triggered degranulation of RBL-2H3 mast cell/basophil cell line by inducing cell death
Source: PubMed Central journal article supplement (PMC7164662; doi:10.1371/journal.pone.0231101), 2020-04-17
Supplement: pone.0231101.s006.pdf [file pone.0231101.s006.pdf]

## S2 Appendix Minimal data set. Values used to build graphs

Values for Fig 1

| Sample            | Hexosaminidase activity OD405 |       |       |
|-------------------|-------------------------------|-------|-------|
| Blank             | 0.082                         | 0.083 | 0.082 |
| Whole cell lysate | 1.271                         | 1.42  | 1.223 |
| After stimulation |                               |       |       |
| None              | 0.135                         | 0.138 | 0.159 |
| WT                | 0.154                         | 0.168 | 0.243 |
| KO                | 0.13                          | 0.144 | 0.16  |
| Sg                | 0.159                         | 0.15  | 0.157 |
| Ss                | 0.157                         | 0.163 | 0.191 |
| H2O2              | 0.178                         | 0.191 | 0.198 |
| P+I               | 0.762                         | 0.686 | 0.77  |

Values for Fig 2A

| Sample                | Hexosaminidase activity OD405 |       |       |
|-----------------------|-------------------------------|-------|-------|
| Blank                 | 0.049                         | 0.048 | 0.05  |
| Whole cell lysate     | 1.611                         | 1.786 | 1.637 |
| None                  | 0.076                         | 0.076 | 0.09  |
| After IgE-stimulation |                               |       |       |
| None                  | 0.399                         | 0.371 | 0.366 |
| WT                    | 0.136                         | 0.167 | 0.084 |
| KO                    | 0.275                         | 0.391 | 0.386 |
| Sg                    | 0.101                         | 0.115 | 0.156 |
| Ss                    | 0.416                         | 0.416 | 0.442 |
| H2O2                  | 0.061                         | 0.075 | 0.079 |

Values for Fig 2B

| Sample                | Hexosaminidase activity OD405 |       |       |
|-----------------------|-------------------------------|-------|-------|
| Blank                 | 0.055                         | 0.063 | 0.059 |
| Whole cell lysate     | 0.492                         | 0.449 | 0.529 |
| None                  | 0.081                         | 0.105 | 0.104 |
| After IgE-stimulation |                               |       |       |

|      |     |       |       |       |
|------|-----|-------|-------|-------|
| None |     | 0.178 | 0.206 | 0.185 |
| WT   | 10  | 0.182 | 0.188 | 0.169 |
|      | 50  | 0.137 | 0.139 | 0.129 |
|      | 200 | 0.098 | 0.101 | 0.096 |
| H2O2 | 0.1 | 0.133 | 0.138 | 0.161 |
|      | 0.5 | 0.085 | 0.095 | 0.116 |
|      | 2   | 0.063 | 0.089 | 0.09  |

Values for Fig 3A

| Sample | Number of viable cell/microscopic area |     |     |
|--------|----------------------------------------|-----|-----|
| None   | 118                                    | 121 | 114 |
| WT     | 0                                      | 0   | 0   |
| KO     | 105                                    | 109 | 129 |
| Sg     | 11                                     | 18  | 5   |
| Ss     | 121                                    | 113 | 109 |
| H2O2   | 0                                      | 0   | 1   |
| P+I    | 57                                     | 40  | 51  |

Values for Fig 3B

| Sample | Number of viable cell/microscopic area |     |     |
|--------|----------------------------------------|-----|-----|
| None   | 118                                    | 139 | 122 |
| WT     | 10                                     | 106 | 98  |
|        | 50                                     | 14  | 30  |
|        | 100                                    | 0   | 0   |
| H2O2   | 0.1                                    | 129 | 125 |
|        | 0.5                                    | 59  | 35  |
|        | 2                                      | 0   | 0   |

Values for Fig 3C

| Sample        | Number of viable cell/microscopic area |     |     |
|---------------|----------------------------------------|-----|-----|
| None          | 102                                    | 115 | 110 |
| WT            | 0                                      | 3   | 3   |
| catalase 10 U | 27                                     | 30  | 34  |

|                |    |    |     |
|----------------|----|----|-----|
| catalase 50 U  | 71 | 83 | 74  |
| catalase 100 U | 97 | 99 | 105 |

Values for Fig 6B

| Sample            | LDH release OD492 |       |       |
|-------------------|-------------------|-------|-------|
| Blank             | 0.051             | 0.05  | 0.053 |
| Whole cell lysate | 1.975             | 2.206 | 2.043 |
| None 3 h          | 0.191             | 0.179 | 0.18  |
| None 6 h          | 0.18              | 0.184 | 0.161 |
| WT 3 h            | 0.213             | 0.194 | 0.176 |
| WT 6 h            | 0.264             | 0.265 | 0.275 |
| KO 3 h            | 0.187             | 0.175 | 0.171 |
| KO 6 h            | 0.144             | 0.148 | 0.155 |
| H2O2 3 h          | 0.181             | 0.175 | 0.15  |
| H2O2 6 h          | 0.416             | 0.401 | 0.417 |
| P+I 3 h           | 0.285             | 0.286 | 0.332 |
| P+I 6 h           | 0.257             | 0.282 | 0.187 |

|                   |       |       |       |
|-------------------|-------|-------|-------|
| Blank             | 0.072 | 0.06  | 0.059 |
| Whole cell lysate | 0.578 | 0.641 | 0.673 |
| None 3 h          | 0.089 | 0.061 | 0.081 |
| None 6 h          | 0.083 | 0.092 | 0.083 |
| Stau 3 h          | 0.101 | 0.119 | 0.107 |
| Stau 6 h          | 0.124 | 0.163 | 0.13  |

Values for Fig 7

| Sample   | IL-4 ng/ml |     |     |
|----------|------------|-----|-----|
| None 3 h | 0.5        | 0   | 1.9 |
| None 6 h | 0.2        | 0.4 | 1.3 |
| WT 3 h   | 1          | 2.2 | 1.7 |
| WT 6 h   | 0.3        | 0.7 | 0.2 |
| KO 3 h   | 2.8        | 1.7 | 2.4 |
| KO 6 h   | 1.1        | 3.9 | 3.4 |
| H2O2 3 h | 1.8        | 0   | 0   |
| H2O2 6 h | 1.6        | 0.3 | 0   |

|          |    |     |     |
|----------|----|-----|-----|
| P+I 3 h  | 21 | 20  | 18  |
| P+I 6 h  | 71 | 75  | 69  |
| None 3 h | 0  | 0.3 | 0   |
| None 6 h | 0  | 0   | 0.5 |
| IgE 3 h  | 60 | 42  | 31  |
| IgE 6 h  | 70 | 60  | 81  |

Values for Fig 8B

| Sample           | Sneezing times/5 min |    |    |    |
|------------------|----------------------|----|----|----|
| No sensitization | 2                    | 0  | 1  | 0  |
| Sensitization    |                      |    |    |    |
| None             | 34                   | 51 | 36 | 48 |
| WT               | 2                    | 18 | 23 | 21 |
| KO               | 43                   | 38 | 43 | 39 |
| H2O2             | 27                   | 15 | 11 | 18 |

Values for Fig 8C

| Sample           | Scraping times/5 min |    |    |    |
|------------------|----------------------|----|----|----|
| No sensitization | 15                   | 14 | 8  | 12 |
| Sensitization    |                      |    |    |    |
| None             | 48                   | 60 | 68 | 37 |
| WT               | 15                   | 9  | 26 | 27 |
| KO               | 55                   | 34 | 47 | 46 |
| H2O2             | 26                   | 29 | 29 | 20 |
